# Supplementary material for: An Untargeted Metabolomics Investigation of Milk from Dairy Cows with Clinical Mastitis by 1H-NMR
Source: MDPI journal article supplement (doi:10.3390/foods10081707), 2021-07-23
Supplement: s1 [file s1]

# An untargeted metabolomics investigation of Milk from Dairy Cows with Clinical Mastitis by $^1\text{H}$ -NMR

Chenglin Zhu<sup>1</sup>, Kaiwei Tang<sup>1</sup>, Xuan Lu<sup>1</sup>, Junni Tang<sup>1,\*</sup> and Luca Laghi<sup>2</sup>

Table S1 Information for molecules identification by means of  $^1\text{H}$ -NMR

|                       | Functional Group | Multiplicity | ppm    |
|-----------------------|------------------|--------------|--------|
| 2-Hydroxyisobutyrate  | $\text{CH}_3$    | s            | 1.3466 |
| 2-Oxoglutarate        | $\text{CH}_2$ -4 | t            | 2.4279 |
| 3-Hydroxybutyrate     | $\text{CH}_3$    | d            | 1.1917 |
| Acetate               | $\text{CH}_3$    | s            | 1.9071 |
| Acetone               | $\text{CH}_3$    | s            | 2.2199 |
| Alanine               | $\text{CH}_3$    | d            | 1.4756 |
| Arginine              | $\text{CH}_2$ -3 | m            | 1.8964 |
| Betaine               | $\text{CH}_3$    | s            | 3.2511 |
| Carnitine             | $\text{CH}_3$    | s            | 3.2040 |
| Choline               | $\text{CH}_3$    | s            | 3.1889 |
| <i>cis</i> -Aconitate | $\text{CH}_2$    | d            | 3.1107 |
| Citrate               | $\text{CH}_2$    | d            | 2.5344 |
| Creatine              | $\text{CH}_3$    | s            | 3.0231 |
| Creatine phosphate    | $\text{CH}_3$    | s            | 3.0302 |
| Creatinine            | $\text{CH}_3$    | s            | 3.0357 |
| Cytidine              | $\text{CH}$ -6   | d            | 6.1161 |
| Dimethyl sulfone      | $\text{CH}_3$    | s            | 3.1418 |
| Dimethylamine         | $\text{CH}_3$    | s            | 2.7100 |
| Ethanol               | $\text{CH}_3$    | t            | 1.1692 |
| Formate               | $\text{CH}$      | s            | 8.4437 |
| Fumarate              | $\text{CH}$      | s            | 6.5087 |
| Galactose             | $\text{CH}$      | d            | 5.2610 |
| Glucose               | $\text{CH}$      | d            | 4.6320 |
| Glucose-1-phosphate   | $\text{CH}$      | dd           | 5.4601 |
| Glutamate             | $\text{CH}_2$ -4 | m            | 2.3363 |
| Glycine               | $\text{CH}_2$    | s            | 3.5530 |
| Hippurate             | $\text{CH}$ -3   | t            | 7.5564 |
| Histidine             | $\text{CH}$      | s            | 8.0919 |
| Isobutyrate           | $\text{CH}_3$    | d            | 1.0615 |
| Isoleucine            | $\text{CH}_3$ -4 | d            | 1.0007 |
| Lactate               | $\text{CH}_3$    | d            | 1.3222 |

|                                     |                    |   |        |
|-------------------------------------|--------------------|---|--------|
| Lactose                             | CH-2               | t | 3.2869 |
| Leucine                             | CH <sub>3</sub>    | t | 0.9464 |
| Lysine                              | CH <sub>2</sub> -6 | t | 3.0150 |
| Malonate                            | CH <sub>2</sub>    | s | 3.1238 |
| Maltose                             | CH                 | d | 5.4001 |
| N,N-Dimethylglycine                 | CH <sub>3</sub>    | s | 2.9039 |
| N-Acetylglucosamine                 | CH <sub>3</sub>    | s | 2.0436 |
| O-Acetylcarnitine                   | CH <sub>3</sub>    | s | 3.1781 |
| Phenylalanine                       | CH-6               | t | 7.4142 |
| Pimelate                            | CH <sub>2</sub> -2 | t | 2.1449 |
| Proline                             | CH <sub>2</sub> -5 | m | 3.3509 |
| Propionate                          | CH <sub>3</sub>    | t | 1.0540 |
| Propylene glycol                    | CH <sub>3</sub>    | d | 1.1212 |
| Pyruvate                            | CH <sub>3</sub>    | s | 2.3616 |
| <i>sn</i> -Glycero-3-phosphocholine | CH <sub>3</sub>    | s | 3.2147 |
| Succinate                           | CH <sub>2</sub>    | s | 2.3949 |
| <i>trans</i> -Aconitate             | CH-2               | s | 6.5782 |
| Trimethylamine N-oxide              | CH <sub>3</sub>    | s | 3.2593 |
| Tyrosine                            | CH-6               | d | 6.9021 |
| Uracil                              | CH-2               | d | 5.7917 |
| Uridine                             | CH-4               | t | 5.9087 |
| Valine                              | CH <sub>3</sub>    | d | 0.9770 |
| Xylose                              | CH                 | d | 4.5790 |

---

*S stands for singlet, d stands for doublet, t stands for triplet and m stands for multiple signals.*
